# Supplementary material for: Reducing Decision to Incision Time Interval for Emergency Cesarean Sections: 24 Months’ Experience from Rural Sierra Leone
Source: MDPI journal article supplement (doi:10.3390/ijerph18168581), 2021-08-13
Supplement: s1 [file s1]

**Supplementary Table S1.** Partners In Health (PIH) support to obstetric unit of Koidu Government Hospital in 2016-2017.

| <b>Comprehensive support provided to KGH by Partners In Health (PIH) in 2017</b> |                                                                                                                                                                                                                                                                                                                                                                                                                                                                                                                                                                                                                                                                                                                                                                                                                                                                                                                                                                                                                                                                                                                                                                                                                                                                                                                        |
|----------------------------------------------------------------------------------|------------------------------------------------------------------------------------------------------------------------------------------------------------------------------------------------------------------------------------------------------------------------------------------------------------------------------------------------------------------------------------------------------------------------------------------------------------------------------------------------------------------------------------------------------------------------------------------------------------------------------------------------------------------------------------------------------------------------------------------------------------------------------------------------------------------------------------------------------------------------------------------------------------------------------------------------------------------------------------------------------------------------------------------------------------------------------------------------------------------------------------------------------------------------------------------------------------------------------------------------------------------------------------------------------------------------|
|                                                                                  | <ol style="list-style-type: none"><li>1. Strengthened clinical accompaniment, service provision and mentorship in the obstetric unit. PIH supported the district with essential staff including 1 Obstetric-Gynecologist, 1 international Nurse-Midwife, 1 international nurse educator, 1 nurse anesthetist, 3 mid-level providers and 2 nurses. It was essential to add the anesthetist to ensure full availability at night and weekend throughout the year.</li><li>2. Conducted regular clinical trainings to obstetric staff</li><li>3. Developed a set of maternity protocols and job aides for standardization and improvement of care in areas where existing ministry of health and sanitation guidelines did not exist</li><li>4. Strengthened blood bank services and procured equipment, supplies and consumables necessary for blood donation campaigns</li><li>5. Provided essential infrastructure support, for example ensuring the availability of power supply</li><li>6. Supported the laboratory and pharmacy systems to ensure drugs and supplies for the maternity ward are available</li><li>7. Supported the execution of monthly Maternal Death Surveillance and Response meetings and other data review meetings</li><li>8. Supported roll out of quality improvement initiatives</li></ol> |

\*These indications are often interrelated, hence they are mixed in our settings.
